# Supplementary material
Source: publisher site journal article supplement (https://www.dovepress.com/article/369481)
Supplement: Supplementary file 1 [file get_supplementary_file.php]

## Supplementary materials

### **Table S1. OHIP-14SP questionnaire (Spanish version with English translation)**

Notes: Adapted from the version validated in Spanish by Montero-Martín *et al.*<sup>1</sup> [The list of questions and scores is publicly available at Diaz-Reissner \*et al.\*<sup>2</sup> CC BY NC \(<https://creativecommons.org/licenses/by-nc/4.0/deed.es>\)](#)

- References*
1. Montero-Martín J, Bravo-Perez M, Albaladejo-Martínez A, Hernández-Martín LA, Rosel-Gallardo EM. Validation the Oral Health Impact Profile (OHIP-14sp) for adults in Spain. *Med Oral Patol Oral Cir Bucal*. 2009;14(1):E44–E50.
  2. Diaz-Reissner CV, Casas-García I, Roldán-Merino J. Calidad de Vida Relacionada con Salud Oral: Impacto de Diversas Situaciones Clínicas Odontológicas y Factores Socio-Demográficos. Revisión de la Literatura [Quality of Life Related to Oral Health: Impact of Various Socio-Demographic Factors and Dental Clinical Situations. Review of Literature]. *Int J Odontostomat*. 2017;11(1):31-39. Spanish. doi: 10.4067/S0718-381X2017000100005.

Establecer el impacto de la salud oral en la calidad de vida mediante el cuestionario OHIP-14SP. Cada pregunta tiene como respuestas probables: nunca (0), casi nunca (1), ocasionalmente (2), frecuentemente (3) y muy frecuentemente (4). Para obtener el puntaje se suman los valores, pudiendo por tanto tener un mínimo de 0 puntos y un máximo de 56 puntos.

*To establish the impact of oral health on quality of life through the OHIP-14SP questionnaire. Each question has as probable answers: never (0), almost never (1), occasionally (2), frequently (3) and very frequently (4). To obtain the score, the values are added, and can therefore have a minimum of 0 points and a maximum of 56 points.*

|                                                                                                                                  | 0 | 1 | 2 | 3 | 4 |
|----------------------------------------------------------------------------------------------------------------------------------|---|---|---|---|---|
| <b>Limitación funcional</b> <i>Functional Limitation</i>                                                                         |   |   |   |   |   |
| 1. ¿Ha tenido dificultad para pronunciar palabras?<br><i>Have you had trouble pronouncing any word?</i>                          |   |   |   |   |   |
| 2. ¿El sabor de sus alimentos ha empeorado?<br><i>Have you felt that your sense of taste has worsened?</i>                       |   |   |   |   |   |
| <b>Dolor físico</b> <i>Physical Pain</i>                                                                                         |   |   |   |   |   |
| 1. ¿Ha sentido dolor en su boca?<br><i>Have you had painful aching in your mouth?</i>                                            |   |   |   |   |   |
| 2. ¿Ha presentado molestia al comer?<br><i>Have you found it uncomfortable to eat any foods?</i>                                 |   |   |   |   |   |
| <b>Malestar psicológico</b> <i>Psychological Discomfort</i>                                                                      |   |   |   |   |   |
| 1. ¿Le preocupan los problemas con su boca?<br><i>Have you been self-conscious?</i>                                              |   |   |   |   |   |
| 2. ¿Se ha sentido estresado?<br><i>Have you felt tense?</i>                                                                      |   |   |   |   |   |
| <b>Incapacidad física</b> <i>Physical Disability</i>                                                                             |   |   |   |   |   |
| 1. ¿Ha tenido que cambiar sus alimentos?<br><i>Has your diet been unsatisfactory?</i>                                            |   |   |   |   |   |
| 2. ¿Ha tenido que interrumpir sus alimentos?<br><i>Have you had to interrupt meals?</i>                                          |   |   |   |   |   |
| <b>Incapacidad psicológica</b> <i>Psychological Disability</i>                                                                   |   |   |   |   |   |
| 1. ¿Ha tenido dificultad para descansar?<br><i>Have you found it difficult to relax?</i>                                         |   |   |   |   |   |
| 2. ¿Se ha sentido avergonzado por problemas con su boca?<br><i>Have you been a bit embarrassed?</i>                              |   |   |   |   |   |
| <b>Incapacidad social</b> <i>Social Handicap</i>                                                                                 |   |   |   |   |   |
| 1. ¿Ha estado irritable debido a problemas con su boca?<br><i>Have you been a bit irritable with other people?</i>               |   |   |   |   |   |
| 2. ¿Ha tenido dificultad para realizar sus actividades diarias?<br><i>Have you had difficulty doing your usual jobs?</i>         |   |   |   |   |   |
| <b>Minusvalía</b> <i>Handicap</i>                                                                                                |   |   |   |   |   |
| 1. ¿Ha sentido que la vida en general ha sido menos agradable?<br><i>Have you felt than life in general was less satisfying?</i> |   |   |   |   |   |
| 2. ¿Ha sido totalmente incapaz de realizar sus actividades diarias?<br><i>Have you been totally unable to function?</i>          |   |   |   |   |   |

**Supplementary Table-S2. Demographic and clinical characteristics**

| <b>Serie</b> | <b>Group</b> | <b>Age (yr)</b> | <b>Sex</b> | <b>Current medical history</b> | <b>Orthodontics</b> | <b>Days of ulcers</b> | <b>Ulcers per year</b> | <b>Type</b> |
|--------------|--------------|-----------------|------------|--------------------------------|---------------------|-----------------------|------------------------|-------------|
| 1            | Healthy      | 23              | Woman      | Chronic tendinitis             | No                  | 0.0                   | 0.0                    |             |
| 2            | Healthy      | 23              | Woman      | Dermatitis                     | Yes                 | 0.0                   | 0.0                    |             |
| 3            | Healthy      | 19              | Woman      | Does not report                | No                  | 0.0                   | 0.0                    |             |
| 4            | Healthy      | 25              | Woman      | Does not report                | No                  | 0.0                   | 0.0                    |             |
| 5            | Healthy      | 23              | Woman      | Does not report                | No                  | 0.0                   | 0.0                    |             |
| 6            | Healthy      | 22              | Woman      | Does not report                | No                  | 0.0                   | 0.0                    |             |
| 7            | Healthy      | 25              | Man        | Does not report                | No                  | 0.0                   | 0.0                    |             |
| 8            | Healthy      | 24              | Woman      | Does not report                | No                  | 0.0                   | 0.0                    |             |
| 9            | Healthy      | 22              | Woman      | Does not report                | No                  | 0.0                   | 0.0                    |             |
| 10           | Healthy      | 27              | Man        | Does not report                | No                  | 0.0                   | 0.0                    |             |
| 11           | Healthy      | 31              | Woman      | Migraine                       | No                  | 0.0                   | 0.0                    |             |
| 12           | Healthy      | 23              | Woman      | Does not report                | No                  | 0.0                   | 0.0                    |             |
| 13           | Healthy      | 28              | Woman      | Asthma                         | No                  | 0.0                   | 0.0                    |             |
| 14           | Healthy      | 24              | Woman      | Dysautonomia                   | No                  | 0.0                   | 0.0                    |             |
| 15           | Healthy      | 27              | Woman      | Dysautonomia                   | No                  | 0.0                   | 0.0                    |             |
| 16           | Healthy      | 21              | Woman      | Does not report                | No                  | 0.0                   | 0.0                    |             |
| 17           | Healthy      | 30              | Man        | Does not report                | No                  | 0.0                   | 0.0                    |             |
| 18           | Healthy      | 25              | Woman      | Does not report                | No                  | 0.0                   | 0.0                    |             |
| 19           | Healthy      | 25              | Woman      | Does not report                | No                  | 0.0                   | 0.0                    |             |
| 20           | Healthy      | 26              | Woman      | Hypothyroidism                 | No                  | 0.0                   | 0.0                    |             |
| 21           | Healthy      | 19              | Woman      | Does not report                | No                  | 0.0                   | 0.0                    |             |
| 22           | Healthy      | 24              | Woman      | Does not report                | No                  | 0.0                   | 0.0                    |             |
| 23           | Healthy      | 41              | Woman      | Does not report                | No                  | 0.0                   | 0.0                    |             |
| 24           | Healthy      | 61              | Woman      | Arterial hypertension          | No                  | 0.0                   | 0.0                    |             |
| 25           | Healthy      | 26              | Woman      | Does not report                | No                  | 0.0                   | 0.0                    |             |
| 26           | Healthy      | 24              | Woman      | Does not report                | No                  | 0.0                   | 0.0                    |             |
| 27           | Healthy      | 35              | Woman      | Arterial hypertension          | No                  | 0.0                   | 0.0                    |             |
| 28           | Healthy      | 18              | Man        | Does not report                | No                  | 0.0                   | 0.0                    |             |
| 29           | Healthy      | 20              | Woman      | Does not report                | No                  | 0.0                   | 0.0                    |             |
| 1            | Remission    | 19              | Woman      | Does not report                | No                  | 0.0                   | 4.0                    |             |
| 2            | Remission    | 21              | Man        | Does not report                | No                  | 0.0                   | 4.0                    |             |
| 3            | Remission    | 24              | Woman      | Does not report                | No                  | 0.0                   | 12.0                   |             |

|              |          |                                |     |     |            |
|--------------|----------|--------------------------------|-----|-----|------------|
| 4 Remission  | 25 Woman | Does not report                | No  | 0.0 | 0.0        |
| 5 Remission  | 19 Woman | Does not report                | No  | 0.0 | 0.0        |
| 6 Remission  | 29 Woman | Does not report                | No  | 0.0 | 0.0        |
| 7 Remission  | 57 Woman | Fatty liver                    | No  | 0.0 | 6.0        |
| 8 Remission  | 25 Woman | Does not report                | No  | 0.0 | 20.0       |
| 9 Remission  | 23 Woman | Does not report                | No  | 0.0 | 6.0        |
| 10 Remission | 26 Woman | Does not report                | No  | 0.0 | 3.0        |
| 11 Remission | 35 Man   | Does not report                | No  | 0.0 | 2.0        |
| 12 Remission | 19 Woman | Does not report                | No  | 0.0 | 2.0        |
| 13 Remission | 18 Woman | Does not report                | No  | 0.0 | 8.0        |
| 14 Remission | 20 Woman | Does not report                | No  | 0.0 | 0.0        |
| 15 Remission | 29 Woman | Does not report                | No  | 0.0 | 2.0        |
| 16 Remission | 20 Woman | Does not report                | Yes | 0.0 | 3.0        |
| 17 Remission | 21 Woman | Does not report                | No  | 0.0 | 8.0        |
| 18 Remission | 24 Woman | Pregnancy                      | No  | 0.0 | 5.0        |
| 19 Remission | 29 Woman | Does not report                | No  | 0.0 | 2.0        |
| 20 Remission | 20 Woman | Does not report                | No  | 0.0 | 6.0        |
| 21 Remission | 26 Woman | Does not report                | No  | 0.0 | 3.0        |
| 22 Remission | 24 Woman | Anxiety disorder               | No  | 0.0 | 3.0        |
| 23 Remission | 21 Woman | Does not report                | No  | 0.0 | 3.0        |
| 24 Remission | 18 Woman | Does not report                | No  | 0.0 | 10.0       |
| 25 Remission | 20 Woman | Asthma                         | No  | 0.0 | 24.0       |
| 26 Remission | 25 Man   | Does not report                | No  | 0.0 | 15.0       |
| 27 Remission | 20 Man   | Does not report                | Yes | 0.0 | 8.0        |
| 28 Remission | 26 Woman | Gastroesophageal reflux, right | No  | 0.0 | 12.0       |
| 29 Remission | 43 Woman | Prediabetes                    | No  | 0.0 | 1.0        |
| 30 Remission | 55 Woman | Hypothyroidism                 | No  | 0.0 | 6.0        |
| 31 Remission | 29 Woman | Does not report                | No  | 0.0 | 10.0       |
| 32 Remission | 21 Woman | Does not report                | No  | 0.0 | 8.0 Minor  |
| 33 Remission | 22 Woman | Does not report                | No  | 0.0 | 0.0 Minor  |
| 1 Ulcer      | 21 Man   | Does not report                | No  | 2.0 | 4.0 Minor  |
| 2 Ulcer      | 19 Woman | Does not report                | No  | 2.0 | 0.0 Minor  |
| 3 Ulcer      | 19 Woman | Does not report                | No  | 3.0 | 4.0 Minor  |
| 4 Ulcer      | 24 Woman | Does not report                | No  | 1.0 | 12.0 Minor |

|          |          |                                |     |     |            |
|----------|----------|--------------------------------|-----|-----|------------|
| 5 Ulcer  | 43 Woman | Prediabetes                    | No  | 3.0 | 1.0 Minor  |
| 6 Ulcer  | 21 Woman | Does not report                | No  | 3.0 | 3.0 Minor  |
| 7 Ulcer  | 25 Woman | Does not report                | No  | 2.0 | 20.0 Minor |
| 8 Ulcer  | 29 Woman | Does not report                | No  | 2.0 | 0.0 Minor  |
| 9 Ulcer  | 25 Woman | Does not report                | No  | 1.0 | 0.0 Minor  |
| 10 Ulcer | 23 Woman | Does not report                | No  | 1.0 | 5.0 Minor  |
| 11 Ulcer | 57 Woman | Fatty liver                    | No  | 2.0 | 6.0 Minor  |
| 12 Ulcer | 29 Woman | Does not report                | No  | 3.0 | 2.0 Minor  |
| 13 Ulcer | 35 Man   | Does not report                | No  | 1.0 | 2.0 Minor  |
| 14 Ulcer | 35 Man   | Does not report                | No  | 2.0 | 2.0 Minor  |
| 15 Ulcer | 18 Woman | Does not report                | No  | 3.0 | 8.0 Minor  |
| 16 Ulcer | 29 Woman | Does not report                | No  | 2.0 | 2.0 Minor  |
| 17 Ulcer | 21 Woman | Does not report                | No  | 2.0 | 8.0 Minor  |
| 18 Ulcer | 26 Woman | Gastroesophageal reflux, right | No  | 3.0 | 12.0 Minor |
| 19 Ulcer | 23 Woman | Does not report                | No  | 3.0 | 6.0 Minor  |
| 20 Ulcer | 26 Woman | Does not report                | No  | 1.0 | 3.0 Minor  |
| 21 Ulcer | 20 Woman | Does not report                | No  | 2.0 | 0.0 Minor  |
| 22 Ulcer | 18 Woman | Does not report                | No  | 2.0 | 10.0 Minor |
| 23 Ulcer | 24 Woman | Pregnancy                      | No  | 2.0 | 5.0 Minor  |
| 24 Ulcer | 24 Woman | Does not report                | No  | 1.0 | 2.0 Minor  |
| 25 Ulcer | 29 Woman | Does not report                | No  | 2.0 | 10.0 Minor |
| 26 Ulcer | 55 Woman | Hypothyroidism                 | No  | 1.0 | 6.0 Minor  |
| 27 Ulcer | 20 Woman | Does not report                | Yes | 3.0 | 0.0 Minor  |
| 28 Ulcer | 20 Man   | Does not report                | Yes | 3.0 | 8.0 Minor  |
| 29 Ulcer | 20 Woman | Asthma                         | No  | 2.0 | 24.0 Minor |
| 30 Ulcer | 22 Woman | Does not report                | No  | 3.0 | 0.0 Minor  |
| 31 Ulcer | 25 Man   | Does not report                | No  | 2.0 | 15.0 Minor |
| 32 Ulcer | 19 Woman | Does not report                | No  | 2.0 | 2.0 Minor  |
| 33 Ulcer | 42 Man   | Does not report                | No  | 2.0 | 12.0 Minor |





|      |     |                                     |     |   |
|------|-----|-------------------------------------|-----|---|
| 5.0  | 1.0 | 5.0 C06.1 Vestibule of mouth        | 6.0 | 0 |
| 2.0  | 1.0 | 2.0 C02.1 Border of tongue          | 3.0 | 0 |
| 4.0  | 2.0 | 3.0 C02.0 Dorsal surface of tongue  | 2.0 | 2 |
| 3.0  | 2.0 | 2.0 C00.4 Mucosa of lower lip       | 2.0 | 1 |
| 3.0  | 1.0 | 3.0 C00.4 Mucosa of lower lip       | 0.0 | 0 |
| 3.0  | 1.0 | 3.0 C02.1 Border of tongue          | 7.0 | 0 |
| 4.0  | 1.0 | 4.0 C00.4 Mucosa of lower lip       | 2.0 | 2 |
| 2.0  | 1.0 | 2.0 C00.4 Mucosa of lower lip       | 7.0 | 1 |
| 2.0  | 2.0 | 1.0 C06.1 Vestibule of mouth        | 4.0 | 0 |
| 3.0  | 2.0 | 2.0 C06.1 Vestibule of mouth        | 4.0 | 0 |
| 3.0  | 1.0 | 3.0 C00.4 Mucosa of lower lip       | 5.0 | 0 |
| 3.0  | 1.0 | 3.0 C00.4 Mucosa of lower lip       | 4.0 | 4 |
| 9.0  | 2.0 | 5.0 C04.9 Floor of mouth, NOS       | 6.0 | 0 |
| 6.0  | 1.0 | 6.0 C04.9 Floor of mouth, NOS       | 7.0 | 3 |
| 5.0  | 1.0 | 5.0 C00.4 Mucosa of lower lip       | 6.0 | 1 |
| 1.0  | 1.0 | 1.0 C06.0 Cheek mucosa              | 0.0 | 0 |
| 4.0  | 1.0 | 4.0 C06.1 Vestibule of mouth        | 5.0 | 0 |
| 4.0  | 1.0 | 4.0 C02.2 Ventral surface of tongue | 4.0 | 0 |
| 7.0  | 1.0 | 7.0 C00.4 Mucosa of lower lip       | 8.0 | 0 |
| 2.0  | 1.0 | 2.0 C06.0 Cheek mucosa              | 2.0 | 0 |
| 3.0  | 1.0 | 3.0 C02.2 Ventral surface of tongue | 5.0 | 0 |
| 10.0 | 3.0 | 3.3 C00.3 Mucosa of upper lip       | 8.0 | 4 |
| 5.0  | 1.0 | 5.0 C05.1 Soft palate, NOS          | 3.0 | 0 |
| 5.0  | 2.0 | 2.5 C00.3 Mucosa of upper lip       | 4.0 | 0 |
| 3.0  | 2.0 | 3.0 C03.1 Lower gum                 | 7.0 | 0 |
| 2.0  | 1.0 | 2.0 C03.0 Upper gum                 | 6.0 | 0 |
| 3.0  | 1.0 | 3.0 C05.1 Soft palate, NOS          | 3.0 | 0 |
| 3.0  | 1.0 | 3.0 C06.0 Cheek mucosa              | 4.0 | 3 |
| 5.0  | 4.0 | 5.0 C06.1 Vestibule of mouth        | 4.0 | 0 |

| OHIP14Sp 2 | OHIP14Sp 3 | OHIP14Sp 4 | OHIP14Sp 5 | OHIP14Sp 6 | OHIP14Sp 7 | OHIP14Sp 8 | OHIP14Sp 9 | OHIP14Sp 10 |
|------------|------------|------------|------------|------------|------------|------------|------------|-------------|
| 0          | 0          | 0          | 4          | 4          | 3          | 3          | 3          | 0           |
| 0          | 0          | 2          | 3          | 3          | 0          | 0          | 4          | 0           |
| 0          | 0          | 0          | 0          | 3          | 3          | 2          | 2          | 0           |
| 3          | 0          | 0          | 4          | 3          | 2          | 0          | 3          | 2           |
| 0          | 1          | 0          | 3          | 3          | 0          | 0          | 2          | 0           |
| 0          | 1          | 0          | 2          | 3          | 1          | 1          | 2          | 1           |
| 0          | 0          | 0          | 2          | 4          | 2          | 4          | 2          | 0           |
| 0          | 1          | 0          | 0          | 3          | 2          | 0          | 2          | 0           |
| 1          | 0          | 0          | 0          | 3          | 0          | 0          | 2          | 0           |
| 0          | 0          | 0          | 1          | 2          | 0          | 0          | 2          | 0           |
| 0          | 0          | 0          | 0          | 4          | 0          | 0          | 3          | 0           |
| 0          | 2          | 0          | 0          | 3          | 1          | 2          | 2          | 0           |
| 0          | 0          | 0          | 0          | 3          | 0          | 0          | 2          | 0           |
| 0          | 1          | 0          | 1          | 4          | 0          | 0          | 4          | 0           |
| 0          | 0          | 0          | 3          | 4          | 0          | 0          | 3          | 0           |
| 0          | 0          | 0          | 3          | 2          | 2          | 0          | 2          | 0           |
| 0          | 0          | 0          | 4          | 3          | 0          | 2          | 2          | 0           |
| 0          | 0          | 0          | 0          | 3          | 0          | 2          | 2          | 0           |
| 1          | 0          | 1          | 2          | 4          | 3          | 3          | 4          | 0           |
| 0          | 0          | 0          | 0          | 4          | 4          | 0          | 4          | 0           |
| 0          | 0          | 0          | 4          | 4          | 0          | 0          | 3          | 0           |
| 0          | 0          | 0          | 0          | 2          | 0          | 0          | 2          | 0           |
| 2          | 0          | 0          | 3          | 4          | 1          | 0          | 4          | 3           |
| 0          | 0          | 0          | 2          | 2          | 0          | 0          | 0          | 0           |
| 0          | 0          | 0          | 4          | 4          | 2          | 0          | 4          | 3           |
| 0          | 0          | 0          | 1          | 2          | 0          | 0          | 0          | 0           |
| 2          | 0          | 0          | 3          | 0          | 0          | 0          | 0          | 0           |
| 0          | 2          | 3          | 3          | 1          | 0          | 0          | 1          | 1           |
| 1          | 0          | 1          | 4          | 1          | 1          | 1          | 0          | 0           |
| 0          | 0          | 0          | 0          | 4          | 0          | 0          | 2          | 0           |
| 0          | 0          | 0          | 2          | 2          | 0          | 0          | 1          | 0           |
| 0          | 0          | 0          | 0          | 3          | 0          | 0          | 0          | 0           |



|   |   |   |   |   |   |   |   |   |   |
|---|---|---|---|---|---|---|---|---|---|
| 0 | 0 | 0 | 3 | 0 | 0 | 0 | 0 | 0 | 0 |
| 0 | 0 | 0 | 0 | 3 | 0 | 0 | 0 | 0 | 0 |
| 0 | 0 | 0 | 3 | 2 | 2 | 0 | 0 | 0 | 0 |
| 0 | 0 | 0 | 2 | 3 | 2 | 0 | 3 | 2 | 2 |
| 0 | 0 | 0 | 3 | 0 | 0 | 0 | 0 | 3 | 3 |
| 0 | 0 | 0 | 0 | 4 | 1 | 0 | 0 | 0 | 0 |
| 0 | 4 | 4 | 4 | 4 | 0 | 0 | 0 | 0 | 0 |
| 0 | 0 | 0 | 1 | 0 | 0 | 0 | 0 | 0 | 0 |
| 0 | 0 | 0 | 4 | 3 | 0 | 0 | 3 | 3 | 0 |
| 0 | 0 | 0 | 1 | 2 | 2 | 2 | 0 | 0 | 0 |
| 0 | 0 | 0 | 2 | 4 | 0 | 0 | 2 | 2 | 0 |
| 0 | 0 | 0 | 3 | 3 | 2 | 0 | 3 | 3 | 0 |
| 0 | 2 | 1 | 4 | 2 | 0 | 0 | 0 | 0 | 0 |
| 1 | 2 | 1 | 3 | 3 | 3 | 0 | 1 | 2 | 2 |
| 0 | 0 | 0 | 1 | 0 | 0 | 0 | 0 | 0 | 0 |
| 0 | 0 | 0 | 0 | 2 | 0 | 0 | 0 | 0 | 0 |
| 0 | 2 | 0 | 4 | 4 | 0 | 0 | 0 | 0 | 1 |
| 0 | 0 | 0 | 2 | 0 | 0 | 0 | 0 | 0 | 0 |
| 0 | 0 | 0 | 0 | 4 | 0 | 0 | 3 | 0 | 0 |
| 0 | 0 | 0 | 4 | 4 | 0 | 0 | 0 | 0 | 0 |
| 0 | 0 | 0 | 4 | 2 | 2 | 2 | 0 | 0 | 0 |
| 0 | 0 | 0 | 3 | 0 | 0 | 0 | 0 | 0 | 0 |
| 0 | 0 | 0 | 1 | 3 | 1 | 0 | 2 | 0 | 0 |
| 0 | 0 | 0 | 2 | 1 | 0 | 0 | 0 | 0 | 0 |
| 0 | 1 | 0 | 2 | 3 | 1 | 0 | 4 | 1 | 1 |
| 0 | 0 | 0 | 2 | 1 | 0 | 0 | 0 | 0 | 0 |
| 0 | 0 | 0 | 3 | 3 | 0 | 0 | 3 | 0 | 0 |
| 0 | 0 | 0 | 3 | 0 | 0 | 0 | 0 | 0 | 0 |
| 0 | 0 | 4 | 3 | 0 | 0 | 2 | 0 | 0 | 0 |
| 0 | 0 | 0 | 1 | 4 | 0 | 0 | 2 | 0 | 0 |
| 0 | 3 | 3 | 0 | 2 | 0 | 0 | 0 | 0 | 0 |
| 0 | 2 | 1 | 0 | 0 | 0 | 0 | 0 | 0 | 0 |
| 0 | 4 | 3 | 2 | 4 | 1 | 1 | 0 | 0 | 0 |
| 2 | 3 | 3 | 3 | 4 | 0 | 0 | 3 | 0 | 0 |

|   |   |   |   |   |   |   |   |   |
|---|---|---|---|---|---|---|---|---|
| 2 | 3 | 4 | 4 | 4 | 0 | 0 | 3 | 0 |
| 1 | 4 | 4 | 4 | 4 | 3 | 4 | 2 | 0 |
| 2 | 2 | 3 | 2 | 0 | 1 | 2 | 1 | 0 |
| 0 | 2 | 3 | 2 | 3 | 2 | 0 | 0 | 0 |
| 0 | 0 | 0 | 3 | 0 | 0 | 0 | 0 | 0 |
| 0 | 2 | 3 | 3 | 0 | 3 | 3 | 1 | 0 |
| 1 | 2 | 3 | 3 | 1 | 2 | 3 | 2 | 3 |
| 0 | 4 | 3 | 4 | 4 | 0 | 0 | 4 | 0 |
| 0 | 1 | 0 | 2 | 2 | 0 | 0 | 0 | 0 |
| 0 | 3 | 0 | 2 | 2 | 0 | 0 | 0 | 0 |
| 0 | 3 | 2 | 0 | 3 | 0 | 0 | 0 | 0 |
| 1 | 4 | 4 | 4 | 4 | 3 | 3 | 2 | 0 |
| 2 | 3 | 4 | 3 | 3 | 0 | 0 | 2 | 3 |
| 0 | 4 | 3 | 2 | 2 | 0 | 0 | 3 | 1 |
| 1 | 4 | 4 | 4 | 4 | 2 | 2 | 4 | 0 |
| 0 | 1 | 0 | 3 | 2 | 0 | 0 | 0 | 0 |
| 1 | 3 | 2 | 2 | 1 | 0 | 0 | 2 | 0 |
| 2 | 4 | 3 | 4 | 2 | 2 | 3 | 2 | 0 |
| 1 | 4 | 3 | 4 | 3 | 0 | 0 | 0 | 2 |
| 0 | 3 | 3 | 2 | 1 | 2 | 1 | 0 | 0 |
| 0 | 4 | 4 | 0 | 0 | 0 | 2 | 1 | 0 |
| 4 | 4 | 4 | 4 | 4 | 4 | 2 | 0 | 3 |
| 0 | 2 | 1 | 4 | 2 | 0 | 0 | 0 | 0 |
| 0 | 4 | 4 | 4 | 2 | 0 | 2 | 2 | 0 |
| 0 | 3 | 3 | 4 | 2 | 0 | 0 | 0 | 0 |
| 0 | 2 | 2 | 2 | 4 | 2 | 2 | 3 | 1 |
| 0 | 4 | 3 | 3 | 1 | 0 | 1 | 2 | 0 |
| 2 | 4 | 4 | 4 | 4 | 0 | 1 | 3 | 0 |
| 0 | 4 | 2 | 3 | 3 | 3 | 2 | 0 | 0 |

| OHIP14Sp 11 | OHIP14Sp 12 | OHIP14Sp 13 | OHIP14Sp 14 | OHIP14Sp total score |
|-------------|-------------|-------------|-------------|----------------------|
| 0           | 0           | 0           | 0           | 17.00                |
| 0           | 0           | 0           | 2           | 14.00                |
| 0           | 0           | 0           | 0           | 13.00                |
| 0           | 0           | 0           | 0           | 17.00                |
| 0           | 0           | 0           | 0           | 9.00                 |
| 0           | 0           | 0           | 0           | 11.00                |
| 0           | 0           | 0           | 0           | 14.00                |
| 0           | 0           | 2           | 0           | 12.00                |
| 0           | 0           | 1           | 0           | 7.00                 |
| 0           | 0           | 0           | 0           | 5.00                 |
| 0           | 0           | 0           | 0           | 7.00                 |
| 0           | 0           | 2           | 0           | 12.00                |
| 0           | 0           | 0           | 0           | 5.00                 |
| 0           | 2           | 2           | 1           | 15.00                |
| 0           | 0           | 0           | 0           | 10.00                |
| 0           | 0           | 0           | 0           | 10.00                |
| 0           | 1           | 0           | 0           | 12.00                |
| 0           | 0           | 0           | 0           | 7.00                 |
| 0           | 2           | 3           | 0           | 23.00                |
| 0           | 0           | 3           | 0           | 17.00                |
| 0           | 0           | 0           | 0           | 11.00                |
| 0           | 0           | 0           | 0           | 4.00                 |
| 0           | 0           | 1           | 0           | 18.00                |
| 0           | 0           | 1           | 0           | 5.00                 |
| 3           | 0           | 0           | 0           | 20.00                |
| 0           | 0           | 0           | 0           | 4.00                 |
| 0           | 0           | 0           | 0           | 5.00                 |
| 0           | 0           | 0           | 0           | 11.00                |
| 0           | 0           | 0           | 0           | 9.00                 |
| 0           | 0           | 0           | 0           | 6.00                 |
| 0           | 0           | 0           | 0           | 5.00                 |
| 0           | 0           | 0           | 0           | 3.00                 |

|   |   |   |   |       |
|---|---|---|---|-------|
| 0 | 0 | 0 | 0 | 3.00  |
| 1 | 0 | 0 | 0 | 4.00  |
| 0 | 0 | 0 | 0 | 7.00  |
| 2 | 0 | 1 | 0 | 15.00 |
| 2 | 0 | 0 | 0 | 8.00  |
| 0 | 0 | 0 | 0 | 5.00  |
| 0 | 0 | 0 | 0 | 16.00 |
| 0 | 0 | 0 | 0 | 1.00  |
| 0 | 0 | 0 | 0 | 10.00 |
| 0 | 0 | 0 | 0 | 7.00  |
| 0 | 0 | 0 | 0 | 8.00  |
| 0 | 0 | 0 | 0 | 11.00 |
| 0 | 0 | 0 | 0 | 9.00  |
| 1 | 1 | 1 | 0 | 21.00 |
| 0 | 0 | 0 | 0 | 1.00  |
| 0 | 0 | 0 | 0 | 2.00  |
| 3 | 0 | 0 | 0 | 14.00 |
| 0 | 0 | 0 | 0 | 2.00  |
| 0 | 0 | 3 | 1 | 11.00 |
| 0 | 0 | 0 | 0 | 8.00  |
| 0 | 0 | 0 | 0 | 10.00 |
| 0 | 0 | 0 | 0 | 3.00  |
| 2 | 1 | 0 | 0 | 10.00 |
| 0 | 0 | 0 | 0 | 3.00  |
| 0 | 0 | 0 | 0 | 12.00 |
| 1 | 0 | 0 | 0 | 4.00  |
| 0 | 0 | 0 | 0 | 9.00  |
| 0 | 0 | 0 | 0 | 3.00  |
| 0 | 0 | 0 | 0 | 9.00  |
| 0 | 0 | 0 | 0 | 7.00  |
| 0 | 0 | 0 | 0 | 8.00  |
| 0 | 0 | 0 | 0 | 0.00  |
| 0 | 0 | 1 | 0 | 17.00 |
| 1 | 0 | 0 | 0 | 19.00 |

|   |   |   |   |       |
|---|---|---|---|-------|
| 1 | 0 | 0 | 0 | 21.00 |
| 1 | 3 | 3 | 0 | 33.00 |
| 1 | 1 | 2 | 2 | 21.00 |
| 0 | 0 | 0 | 0 | 13.00 |
| 0 | 0 | 0 | 0 | 3.00  |
| 1 | 2 | 1 | 0 | 19.00 |
| 2 | 2 | 0 | 0 | 26.00 |
| 1 | 3 | 0 | 0 | 24.00 |
| 0 | 0 | 0 | 0 | 5.00  |
| 0 | 0 | 0 | 0 | 7.00  |
| 0 | 0 | 0 | 0 | 8.00  |
| 4 | 2 | 3 | 0 | 38.00 |
| 3 | 2 | 3 | 1 | 29.00 |
| 0 | 1 | 0 | 0 | 19.00 |
| 2 | 1 | 1 | 0 | 30.00 |
| 0 | 0 | 0 | 0 | 6.00  |
| 2 | 0 | 1 | 0 | 14.00 |
| 2 | 0 | 0 | 0 | 24.00 |
| 2 | 2 | 1 | 0 | 22.00 |
| 1 | 0 | 3 | 0 | 16.00 |
| 0 | 0 | 0 | 0 | 11.00 |
| 1 | 0 | 2 | 0 | 36.00 |
| 0 | 0 | 0 | 0 | 9.00  |
| 0 | 1 | 1 | 0 | 20.00 |
| 2 | 0 | 0 | 0 | 14.00 |
| 2 | 1 | 1 | 0 | 22.00 |
| 3 | 1 | 2 | 0 | 20.00 |
| 0 | 0 | 0 | 0 | 25.00 |
| 2 | 0 | 2 | 0 | 21.00 |
